# Supplementary material
Source: PubMed Central journal article supplement (PMC9544106)
Supplement: FSB2-36-0-s001.pdf [file FSB2-36-0-s001.pdf]

SUPPLEMENTAL INFORMATION

**Central Role of Intestinal Epithelial Glucocorticoid Receptor in Alcohol and Corticosterone-Induced Gut Permeability and Systemic Response**

<sup>2\*</sup>Pradeep K. Shukla, <sup>2\*</sup>Avtar S. Meena, <sup>3</sup>Joseph F. Pierre, <sup>1,2</sup>¶RadhaKrishna Rao

<sup>1</sup>Memphis Veterans Affairs Medical Center, Memphis, TN, USA, and the Department of <sup>2</sup>Physiology and <sup>3</sup>Pediatrics, College of Medicine, University of Tennessee Health Science Center, Memphis, TN, USA.

**Correspondence to:**

¶*Address for correspondence:*

R. K. Rao, Ph.D., AGAF

Department of Physiology

University of Tennessee Health Science Center

3 N Dunlap, Suite S303, Memphis, TN 38163

*Phone:* (901) 448-3235; *Fax:* (901) 448-3139; *Email:* rrao2@uthsc.edu

| Table S1: PCR primer sequences                         |                                                                       |
|--------------------------------------------------------|-----------------------------------------------------------------------|
| Gene                                                   | 5'-3' Sequence                                                        |
| IL-1 $\beta$                                           | Forward: GCAACTGTTTCCTGAACTCAACT<br>Reverse: ATCTTTTGGGGTCCGTCAACT    |
| IL-6                                                   | Forward: TAGTCCTTCCTACCCCAATTTCC<br>Reverse: TTGGTCCTTAGCCACTCCTTC    |
| TNF- $\alpha$                                          | Forward: CCCTCACACTCAGATCATCTTCT<br>Reverse: GCTACGACGTGGGCTACAG      |
| MCP-1/CCL2                                             | Forward: TTAAAAACCTGGATCGGAACCAA<br>Reverse: GCATTAGCTTCAGATTTACGGGT  |
| GAPDH                                                  | Forward: CTGCACCACCAACTGCTTAG<br>Reverse: GGGCCATCCACAGTCTTCT         |
| 16S rDNA, (universal)                                  | Forward: ACTCCTACGGGAGGCAGCAGT<br>Reverse: ATTACCGCGGCTGCTGGC         |
| 23S rDNA ( <i>Enterobacteriaceae</i> ) <i>En-lsu-1</i> | Forward: TGCCGTA ACTTCGGGAGAAGGCA<br>Reverse: TCAAGGACCAGTGTT CAGTGTC |
| 16S rDNA ( <i>E. coli</i> ) <i>Ecoli</i>               | Forward: CATGCCGCGTGTATGAAGAA<br>Reverse: CGGGTAACGTCAATGAGCAA        |
| All <i>Lactobacillus</i>                               | Forward: AGGGTGAAGTCGTAACAAGTAGCC<br>Reverse: CCACCTTCCTCCGGTTTGTC    |

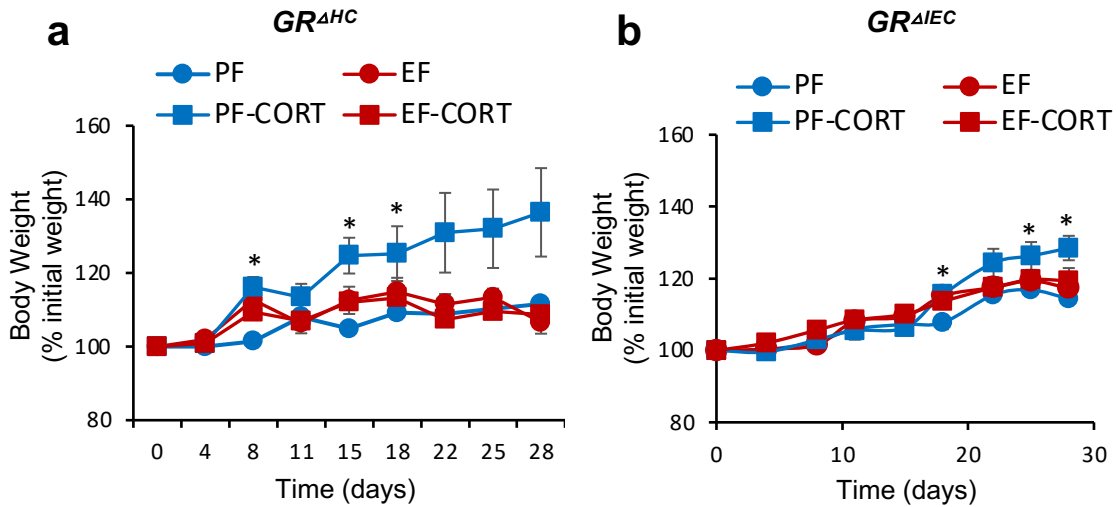

**Figure S1**

**Intestinal glucocorticoid receptor mediates alcohol and corticosterone-induced effects on body weight changes.**

Adult  $GR^{\Delta HC}$  (a) and  $GR^{\Delta IEC}$  (b) mice were fed a liquid diet with (EF) or without (PF) ethanol for four weeks. In some groups, animals were injected with corticosterone (Cort) daily; the other groups received the vehicle. Body weights were recorded twice a week. Values are Mean  $\pm$  SEM (n = 6). Asterisks indicate the values that significantly ( $p < 0.05$ ) differ from corresponding PF values.

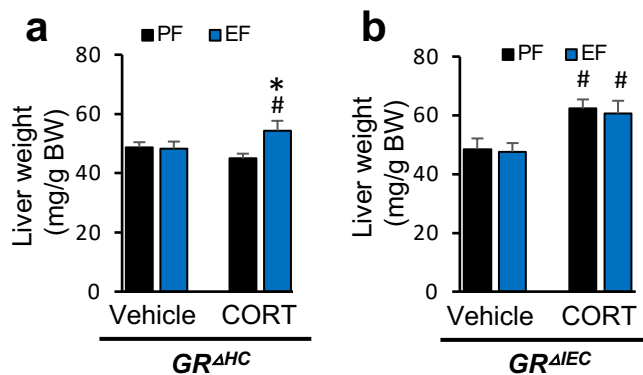

**Figure S2**  
**Intestinal glucocorticoid receptor mediates alcohol and corticosterone-induced effects on the liver.**

Adult  $GR^{\Delta HC}$  (a) and  $GR^{\Delta IEC}$  (b) mice were fed a liquid diet with (EF) or without (PF) ethanol for four weeks. In some groups, animals were injected with corticosterone (Cort) daily; the other groups received the vehicle. At the end of treatments, liver weights recorded (a & b). Values are mean  $\pm$  SEM (n = 6). Asterisk indicates the value that significantly ( $p < 0.05$ ) differ from corresponding PF value; hashtags indicate the values that differ from corresponding “Vehicle” values.

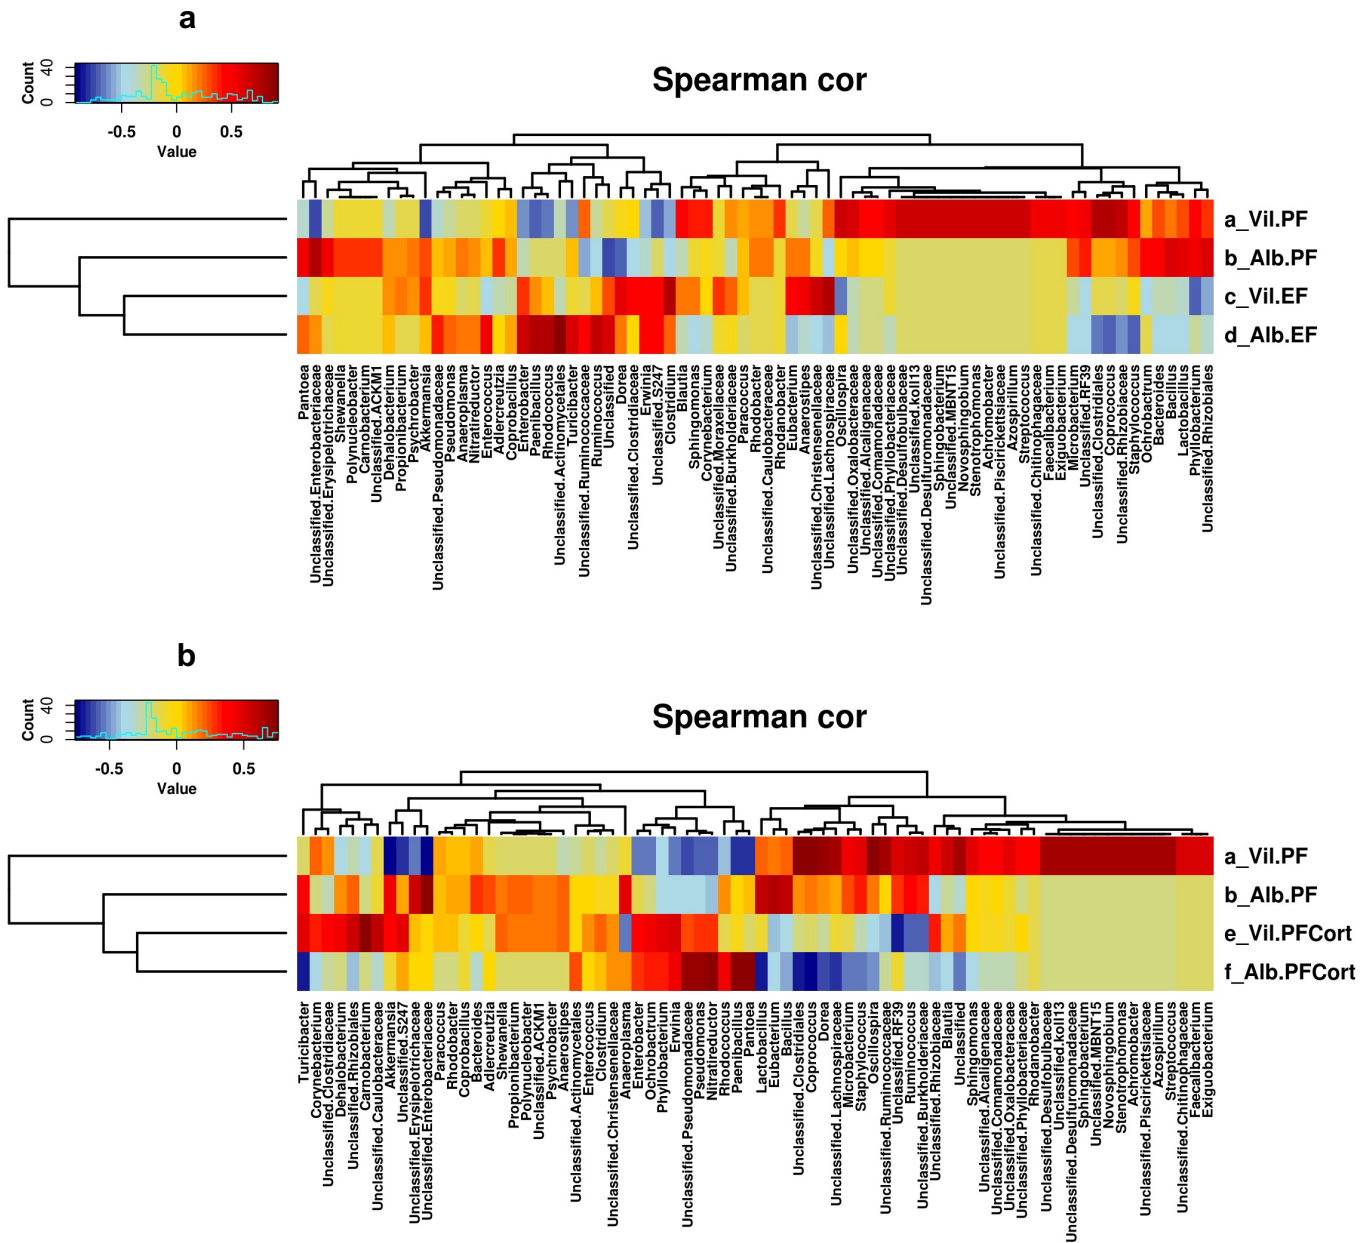

**Figure S3**  
**Intestinal glucocorticoid receptor mediates alcohol and corticosterone-induced effects on microbiota composition.**

Adult *GR<sup>AHC</sup>* and *GR<sup>AEC</sup>* mice were fed a liquid diet with (EF) or without (PF) ethanol for four weeks. In some groups, animals were injected with corticosterone (Cort) daily; the other groups received the vehicle. The composition of microbiota in colonic flushing was analyzed by 16S rRNA-sequencing and metagenomics. Spearman's correlation of microbiota at the genus level was analyzed PF vs EF (a) and PF vs Cort (b).

## LEfSe

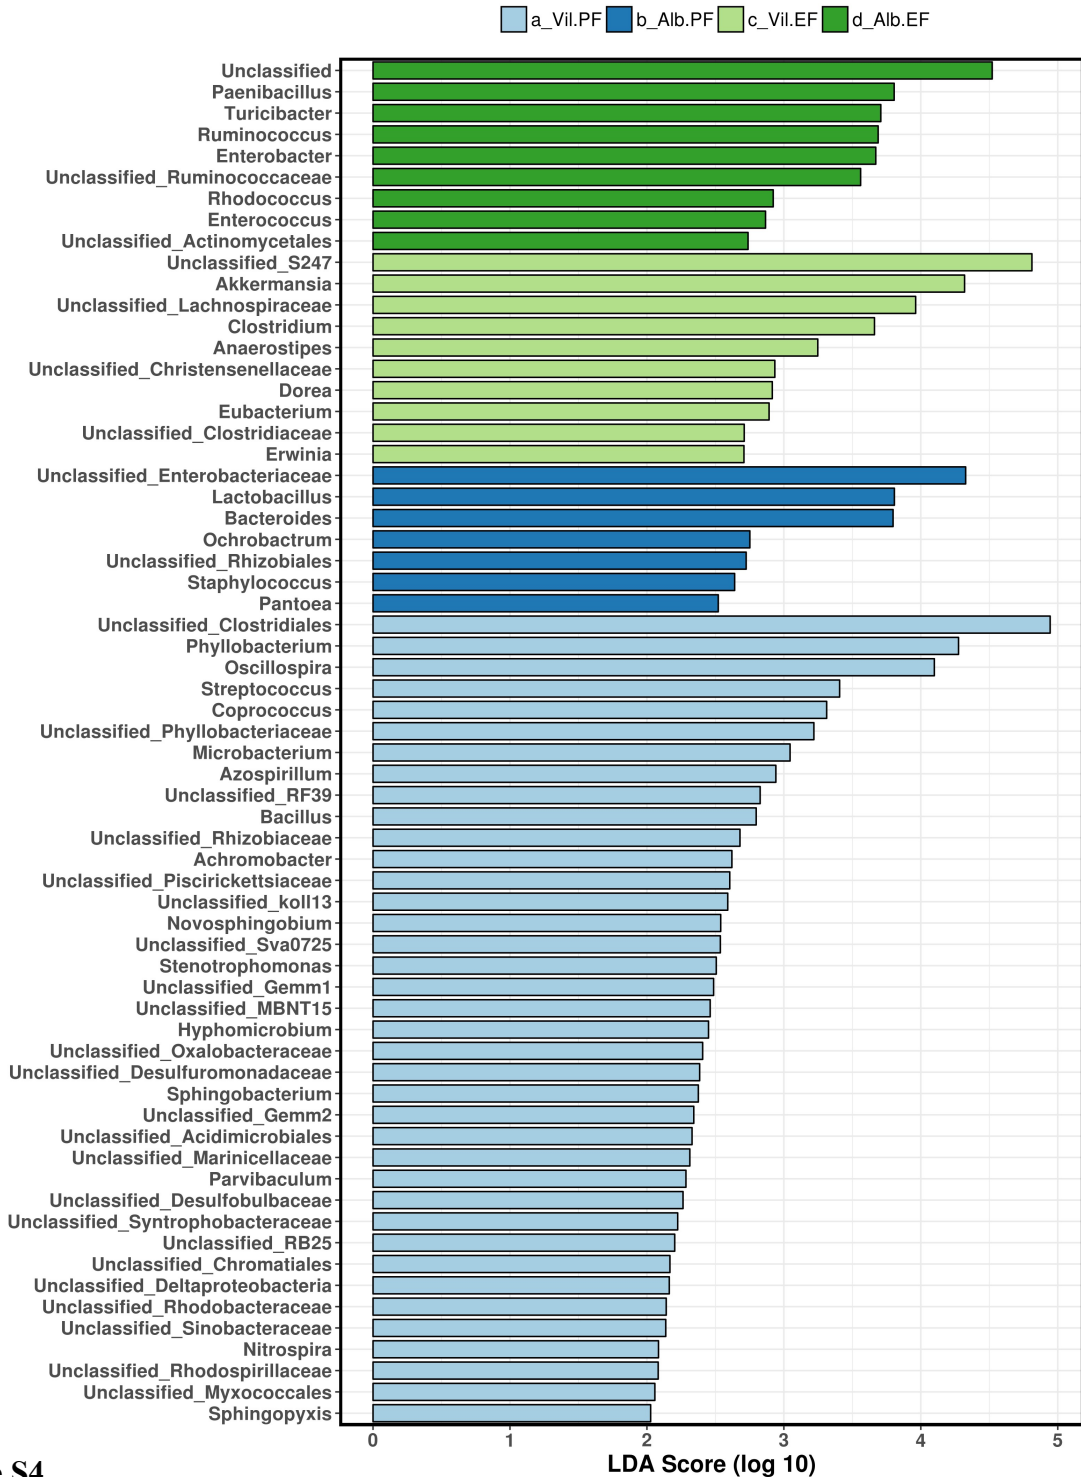

Figure S4

**Intestinal glucocorticoid receptor mediates alcohol-induced effects on microbiota composition.**

Adult  $GR^{AHC}$  and  $GR^{AEC}$  mice were fed a liquid diet with (EF) or without (PF) ethanol for four weeks. The composition of microbiota in colonic flushing was analyzed by 16S rRNA-sequencing and metagenomics. Linear discriminate analysis of effect size (LefSe) was used to identify enriched taxa following ethanol feeding.

## LefSe

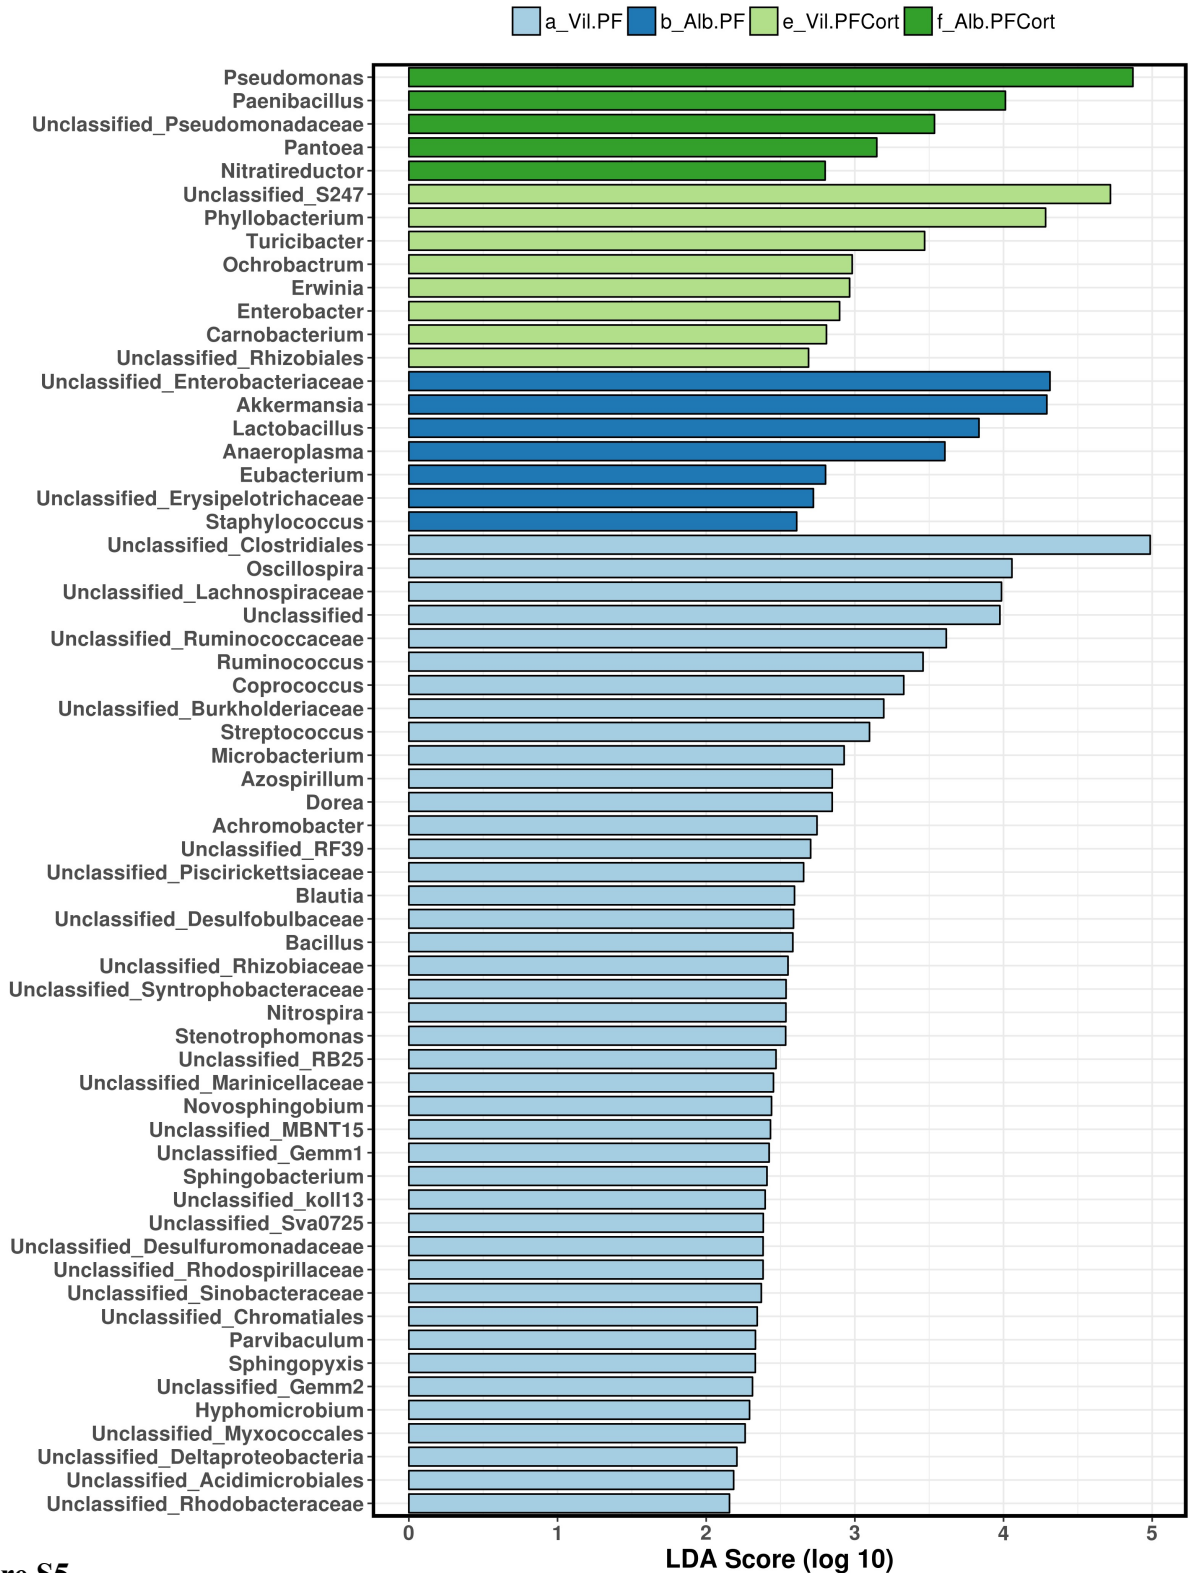

**Figure S5**

**Intestinal glucocorticoid receptor mediates corticosterone-induced effects on microbiota composition.**

Adult  $GR^{AHC}$  and  $GR^{AEC}$  mice were injected with corticosterone (Cort) daily; the other groups received the vehicle. The composition of microbiota in colonic flushing was analyzed by 16S rRNA-sequencing and metagenomics. Linear discriminate analysis of effect size (LefSe) was used to identify enriched taxa following corticosterone.

LefSe

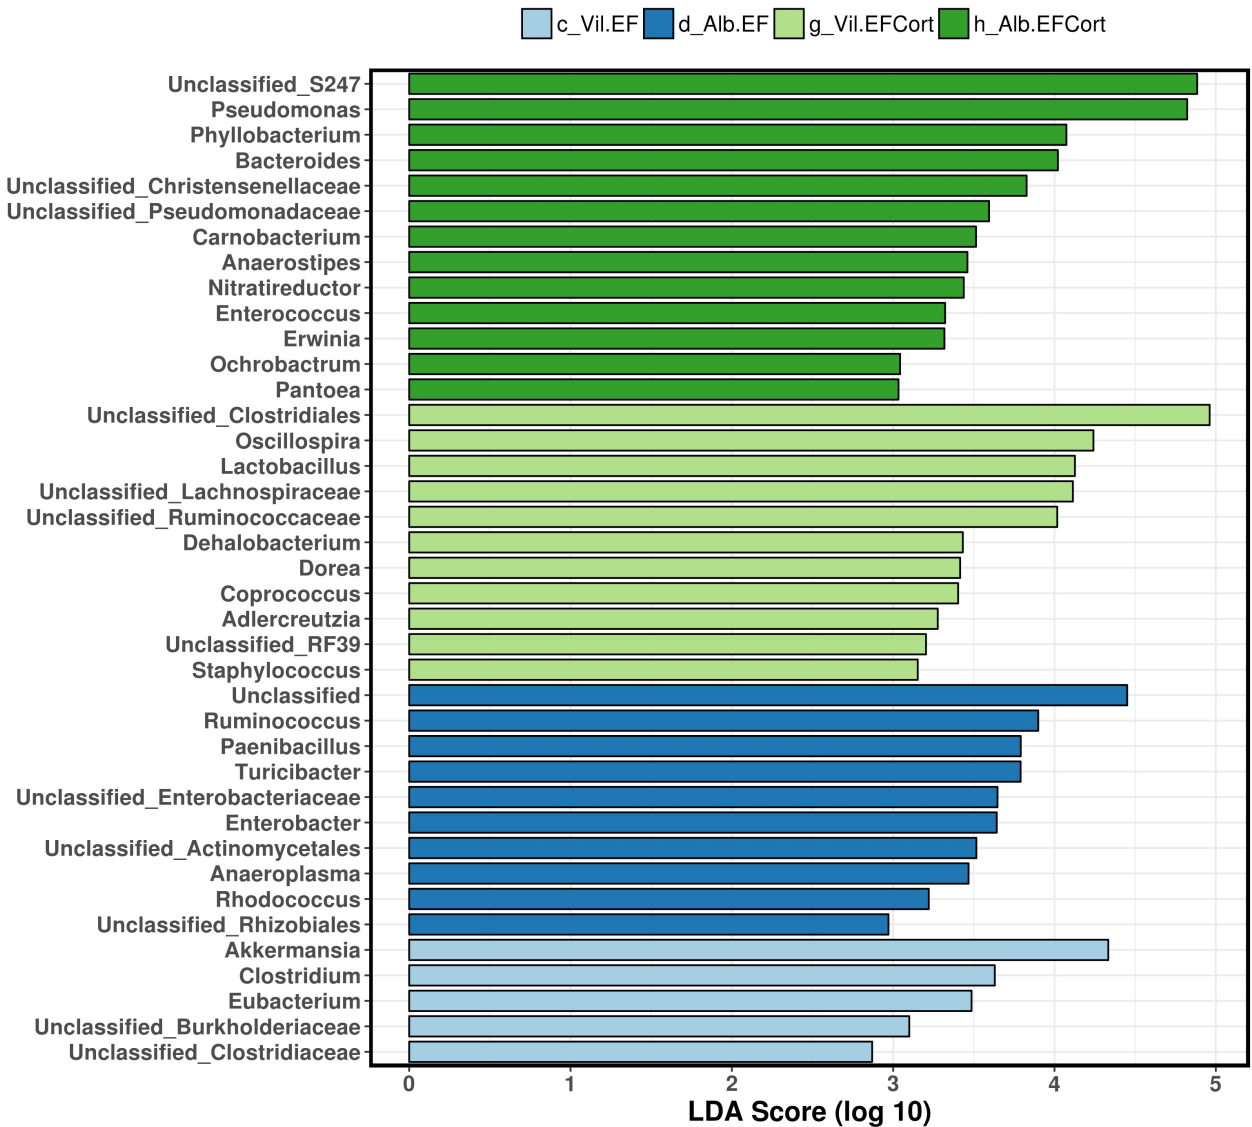

**Figure S6**

**Intestinal glucocorticoid receptor mediates alcohol and corticosterone-induced effects on microbiota composition.** Adult  $GR^{AHC}$  and  $GR^{AEC}$  mice were fed a liquid diet with (EF) or without (PF) ethanol for four weeks. In some groups, animals were injected with corticosterone (Cort) daily; the other groups received the vehicle. The composition of microbiota in colonic flushing was analyzed by 16S rRNA-sequencing and metagenomics. Linear discriminate analysis of effect size (LefSe) was used to identify enriched taxa following corticosterone.
